# Supplementary material for: Technological quality requirements for stereotactic radiotherapy
Source: Springer Nature journal article supplement (doi:10.1007/s00066-020-01583-2), 2020-03-24
Supplement: MOESM1 [file 17827180]

## Strahlentherapie und Onkologie

Supplementary material to:

### “Technological quality requirements for stereotactic radiotherapy

### Expert review group consensus from the DGMP Working Group for Physics and Technology in Stereotactic Radiotherapy”

Daniela Schmitt\*, Oliver Blanck, Tobias Gauer, Michael Fix, Thomas B. Brunner, Jens Fleckenstein, Britta Loutfi-Krauss, Peter Manser, Rene Werner, Maria-Lisa Wilhelm, Wolfgang W. Baus, Christos Moustakis

\*Universitätsklinikum Heidelberg, Klinik für Radioonkologie und Strahlentherapie, Heidelberg, Deutschland und National Center for Radiation Research in Oncology (NCRO) und Heidelberger Institut für Radioonkologie (HIRO), Heidelberg, Deutschland  
E-Mail: Daniela.Schmitt@med.uni-heidelberg.de

| Reference<br>(Year Published)<br>(Sub-Reference,<br>Year published) | Mechanical Precision<br>in End-To-End Test<br>(median/range or mean<br>+ standard deviation) | Dosimetry Precision<br>in End-To-End Test<br>(median/range or mean<br>+ standard deviation) | Dosimetry Precision<br>in Patient Specific<br>Phantom Test<br>(median/range or mean<br>+ standard deviation) | Report /<br>Tested System | Measurement<br>Tools | Volume Specific<br>Recommendation | Comments                                                         |
|---------------------------------------------------------------------|----------------------------------------------------------------------------------------------|---------------------------------------------------------------------------------------------|--------------------------------------------------------------------------------------------------------------|---------------------------|----------------------|-----------------------------------|------------------------------------------------------------------|
| IAEA Technical<br>Reports Series 483<br>(2017) [4]                  | 2mm                                                                                          | 3–10%                                                                                       | 5–10%                                                                                                        | General Report            | n.s.                 | n.s.                              | For EBRT only,<br>SRS/SRT/ SBRT<br>not specified                 |
| ESTRO / ACROP<br>Guideline for Lung<br>SBRT (2017) [20]             | 1.25mm (0.5–4 mm)                                                                            | 3% (2–5%)                                                                                   | No Consensus                                                                                                 | Consensus<br>Guideline    | n.s.                 | n.s.                              | For lung SBRT only,<br>small consensus, no<br>procedural details |
| ICRU Report 91<br>(2017) [3]                                        |                                                                                              | n.s.                                                                                        | n.s.                                                                                                         | Expert<br>Guideline       | n.s.                 | n.s.                              | References only, no<br>recommendation for<br>end-to-end accuracy |
| (Hacker, 2006)                                                      | $\leq 1.5\text{mm} \pm 0.7\text{mm}$                                                         |                                                                                             |                                                                                                              | ExacTrac                  |                      |                                   |                                                                  |
| (Jin, 2008)                                                         | $0.56\text{mm} \pm 0.7\text{mm}$                                                             |                                                                                             |                                                                                                              | ExacTrac                  |                      |                                   |                                                                  |
| (Verellen, 2003)                                                    | $0.6\text{mm} \pm 0.9\text{mm}$                                                              |                                                                                             |                                                                                                              | ExacTrac                  |                      |                                   |                                                                  |
| (Antypas, 2008)                                                     | $0.56\text{mm} \pm 0.7\text{mm}$                                                             |                                                                                             |                                                                                                              | CyberKnife                |                      |                                   |                                                                  |

|                                                            |                                                               |                                                                  |      |                                                          |                                 |      |                                                                                |
|------------------------------------------------------------|---------------------------------------------------------------|------------------------------------------------------------------|------|----------------------------------------------------------|---------------------------------|------|--------------------------------------------------------------------------------|
| (Desai, 2006)                                              | 0.8mm ± 0.05mm                                                |                                                                  |      | CyberKnife                                               |                                 |      |                                                                                |
| (Kilby, 2010)                                              | 0.4mm ± 0.1mm<br>0.5mm ± 0.2mm<br>0.3mm ± 0.1mm               |                                                                  |      | CyberKnife<br>- 6D Skull<br>- XSight Spine<br>- Fiducial |                                 |      |                                                                                |
| (Hyde, 2012)                                               | < 1.4mm and < 0.7°<br>(95% CI)                                |                                                                  |      | CBCT                                                     |                                 |      |                                                                                |
| (Sharpe, 2006)                                             | 1–1.5mm (95% CI)                                              |                                                                  |      | CBCT                                                     |                                 |      |                                                                                |
| (Fenwick, 2004)                                            | ±1mm                                                          |                                                                  |      | TomoTherapy                                              |                                 |      |                                                                                |
| (Boswell, 2006)                                            | 1mm                                                           |                                                                  |      | TomoTherapy                                              |                                 |      |                                                                                |
| (Depuydt, 2011)                                            | 0.54mm ± 0.2mm                                                |                                                                  |      | VERO                                                     |                                 |      |                                                                                |
| AAPM-RSS<br>Guideline 9.a<br>(2017) [172]                  |                                                               |                                                                  |      | Expert<br>Guideline                                      |                                 |      | To be performed<br>annually/quarterly,<br>no details provided                  |
|                                                            | 1.0mm                                                         | 5%                                                               | n.s. | C-Arm LINAC /<br>TomoTherapy                             | n.s.                            | n.s. |                                                                                |
|                                                            | 1.0mm (static)<br>1.5mm (moving)                              | n.s.                                                             | n.s. | CyberKnife                                               | n.s.                            | n.s. |                                                                                |
| Dosimetry Audit in<br>lung SBRT trials<br>(2017) [206]     |                                                               |                                                                  | n.s. | Expert Report                                            | Anthropomorphic<br>lung phantom | n.s. | New and large data<br>included, though no<br>recommendation,<br>Lung SBRT only |
| NRG LU002,<br>BR001, BR002,<br>LUSTRE OCOG<br>(IROC, 2013) | n.s.                                                          | 0.9%<br>1.8%<br>3.2%<br>3.8%                                     |      | Acuros<br>Monte Carlo<br>Superposition<br>AAA            | TLD, Film                       |      |                                                                                |
| SARON, CORE<br>(UK, 2017)                                  | 3mm (-6–7mm) 100%<br>5mm (-10–19mm) 50%<br>Isodose-to-Isodose | 0.7% (-1.0–2.6%)<br>0.3% (-2.9–3.2%)<br>0.4 ± 1.4%<br>1.4 ± 3.4% |      | Conformal<br>IMAT                                        | Alanine Pellets,<br>Film        |      |                                                                                |

|                                      |                                                                 |                                   |                                                                                   |                                                          |                                                 |                                              |                                                                                                     |
|--------------------------------------|-----------------------------------------------------------------|-----------------------------------|-----------------------------------------------------------------------------------|----------------------------------------------------------|-------------------------------------------------|----------------------------------------------|-----------------------------------------------------------------------------------------------------|
| AAPM TG 101 Report (2010) [2]        |                                                                 | n.s.                              | n.s.                                                                              | Report with Guideline                                    |                                                 | n.s.                                         | References only, no recommendation                                                                  |
| (Ryu, 2001)                          | 1.0–1.2mm (RMS)                                                 |                                   |                                                                                   | Stereo X-Ray                                             | Hidden target                                   |                                              |                                                                                                     |
| (Verellen, 2003)                     | 0.41 ± 0.92 mm                                                  |                                   |                                                                                   | Stereo X-Ray                                             | Hidden target                                   |                                              |                                                                                                     |
| (Verellen, 2003)                     | 0.28 ± 0.36 mm                                                  |                                   |                                                                                   | Stereo X-Ray                                             | Fiducials                                       |                                              |                                                                                                     |
| (Yu, 2004)                           | 0.68 ± 0.29 mm                                                  |                                   |                                                                                   | Stereo X-Ray                                             | Fiducials                                       |                                              |                                                                                                     |
| (Solberg, 2008)                      | 1.10 ± 0.42 mm                                                  |                                   |                                                                                   | Stereo X-Ray                                             | Anthropomorphic phantom                         |                                              |                                                                                                     |
| COMP Report Gamma Knife (2018) [209] | n.s.                                                            | 1–5%/0.5 mm (Gamma, no specifics) | n.s.                                                                              | Report with Guideline / Gamma Knife                      | Appropriate (1% with Ion-Chamber, 5% with Film) | n.s.                                         | No specific procedural details given                                                                |
| COMP Report CyberKnife (2018) [189]  | 0.75mm (static)<br>1mm (moving )                                | n.s.                              | Gamma with absolute dose and 90% pass rate:<br>5%/2mm (static)<br>5%/3mm (moving) | CyberKnife                                               | Appropriate (≤10 mm collimator with Film)       | ≤10mm collimator split for measurement tools | For mechanical accuracy stricter (newer systems), but for DQA weaker recommendations as AAPM TG 135 |
| COMP Report CBCT (2018) [202]        | ±1mm                                                            | n.s.                              | n.s.                                                                              | CBCT                                                     | n.s.                                            | n.s.                                         | No specific procedural details given                                                                |
| AAPM TG 135 Report (2011) [188]      | <0.9mm (static)<br><1.5mm (moving )                             | n.s.                              | Gamma with absolute dose and 90% pass rate:<br>2%/2mm (static)<br>3%/3mm (moving) | CyberKnife                                               | n.s.                                            | n.s.                                         | No specific DQA procedural details given, for old systems only                                      |
| Wen et al. (2018) [204]              | 1.0 ± 0.1 mm                                                    | n.s.                              | 1.64 ± 1.90% (-3.50–0.79%)<br>Gamma (no details)<br>96.87% (3%/1mm)               | MR-Linac                                                 | Film                                            | n.s.                                         | Monocentric, prototype phantoms                                                                     |
| Pantelis et al. (2018) [212]         | Gel <0.66 mm<br>0.4 ± 0.18mm<br>0.55 ± 0.20 mm<br>0.40 ± 0.19mm | n.s.                              | n.s.                                                                              | CyberKnife<br>- 6D Skull<br>- XSight Spine<br>- Fiducial | Gel<br>Film                                     | n.s.                                         | Monocentric, but comprehensive                                                                      |

|                                  |                                                                 |                                                             |                                                                                                                                         |            |                                 |             |                                                                           |
|----------------------------------|-----------------------------------------------------------------|-------------------------------------------------------------|-----------------------------------------------------------------------------------------------------------------------------------------|------------|---------------------------------|-------------|---------------------------------------------------------------------------|
| Kron et al. (2018) [201]         | < 3 mm (stationary)                                             | 0-2.6% difference between moving and stationary measurement | n.s.                                                                                                                                    | CBCT       | Film with motion platform       | n.s.        | Multicenter, lung only, limited evaluation quality                        |
| Kurosu et al. (2017) [217]       | n.s.                                                            | n.s.                                                        | 1.0 ± 0.9% (isocentric)<br>0.5 ± 1.4% (conformal, homogeneous dose)<br>4.1 ± 2.8% (conformal, inhomogeneous dose)                       | CyberKnife | Ion-Chamber                     | n.s.        | Monocentric, point dose measurement error analysis based on dose gradient |
| Bellec et al. (2017) [218]       | n.s.                                                            | n.s.                                                        | Gamma 3% relative dose and 1.5mm DTA >88% for error detection                                                                           | CyberKnife | Film Process-Control-Statistics | n.s.        | Monocentric, large data set, process control                              |
| Calvo Ortega et al. (2017) [199] | 1.4 ± 0.2mm<br>1.8mm (95% CI)                                   | n.s.                                                        | n.s.                                                                                                                                    | CBCT       | Head Phantom Film               | n.s.        | Monocentric, SRS only                                                     |
| Colodro et al. (2017) [216]      | n.s.                                                            | n.s.                                                        | Gamma 3%/1.5mm (absolute dose)<br>98.8% (95.8–100.0%)<br>99.3% (97.9–99.9%) (relative dose)<br>80.7% (65.2–92.9%)<br>92.7% (87.5–97.3%) | CBCT       | Ion-Chamber Array Film          | 6.8-79.4ccm | Monocentric, lung SBRT only, gamma pass rate analysis                     |
| Dimitriadis et al. (2016) [200]  | 0.8mm (0.1-2.0mm)                                               | n.s.                                                        | n.s.                                                                                                                                    | All        | n.s.                            | n.s.        | Questionnaire, SRS only                                                   |
| Fürweger et al. (2016) [195]     | 0.38 ± 0.05mm                                                   | n.s.                                                        | n.s.                                                                                                                                    | CyberKnife | Film                            | n.s.        | Monocentric, small series                                                 |
| Calvo Ortega et al. (2016) [203] | -0.4 ± 0.6 mm LR<br>-0.1 ± 0.4 mm AP<br>0.2 ± 0.4 mm SI         | n.s.                                                        | n.s.                                                                                                                                    | CBCT       | Head Phantom                    | n.s.        | Monocentric, SRS only                                                     |
| Wen et al. (2016) [211]          | 0.44–0.64mm (beam positioning)<br>0.27–0.61mm (gantry rotation) | n.s.                                                        | n.s.                                                                                                                                    | Edge       | Film                            | n.s.        | Monocentric, prototype phantom, SRS/SRT only                              |

|                               |                                                                          |                                                                                                                                   |                                                                                                                                                      |                                                                        |                                                                                          |                                   |                                                                                                        |
|-------------------------------|--------------------------------------------------------------------------|-----------------------------------------------------------------------------------------------------------------------------------|------------------------------------------------------------------------------------------------------------------------------------------------------|------------------------------------------------------------------------|------------------------------------------------------------------------------------------|-----------------------------------|--------------------------------------------------------------------------------------------------------|
| Colvill et al. (2016) [89]    | n.s.                                                                     | n.s.                                                                                                                              | Gamma 2% absolute dose and 2mm DTA<br>Motion Compensation<br>98.4% (lung)<br>98.6% (prostate)<br>No Compensation<br>84.8% (lung)<br>82.7% (prostate) | C-Arm with<br>- MLC Tracking<br>- Couch Tracking<br>CyberKnife<br>Vero | Diode or Ion-Chamber Array or Film with motion platform and multiple given motion traces | 7.2cc (lung)<br>55.3cc (prostate) | Multicenter benchmark for motion compensation systems, large variety in measurement systems, SBRT only |
| Sothmann et al. (2016) [205]  | -1.0–0.7mm (LR)<br>-0.6–0.1mm (SI)<br>-0.8–0.2mm (LR)<br>-0.8–0.4mm (SI) | n.s.                                                                                                                              | 1–2% (regular motion)<br>2–4% (complex motion)<br>1–2% (regular motion)<br>2–3% (complex motion)                                                     | CyberKnife<br>Vero                                                     | Ion-Chamber Array with motion platform and patient motion                                | 30-180ccm (liver)                 | Benchmark and error classification for motion changes, SBRT only                                       |
| Blanck et al. (2016) [197]    | 0.15mm (end-to-end)<br>0.97 (0.1–1.8mm)<br>(patient specific QA)         | n.s.                                                                                                                              | Gamma 3% relative dose and 1mm DTA<br>95.8% (90.5–100%)                                                                                              | CyberKnife                                                             | Ion-Chamber Array                                                                        | n.s.                              | Multicenter, geometric errors attributed to array                                                      |
| Sarkar et al. (2016) [208]    | n.s.                                                                     | -1.4–1%                                                                                                                           | Gamma 2% absolute dose and 2mm DTA<br>83.4%–98.0%                                                                                                    | Frame<br>CBCT<br>Stereo X-Ray                                          | Ion-Chamber<br>Film                                                                      | n.s.                              | Phantom / technique comparison, small study, monocentric                                               |
| Blanck et al. (2015) [196]    | 0.55mm (end-to-end)<br>0.45mm (0.2–0.9mm)<br>(patient specific QA)       | n.s.                                                                                                                              | Gamma 3% relative dose and 1mm DTA<br>95.45% (81.3–100%)                                                                                             | CyberKnife                                                             | Film                                                                                     | n.s.                              | Multicenter, dosimetric errors attributed to film                                                      |
| Gallo et al. (2015) [207]     | n.s.                                                                     | 1.5% (1.4-3.1%)<br>Gamma with absolute dose and 90% pass rate:<br>96.1–100% (3%/3mm)<br>93.3–100% (2%/2mm)<br>49.8–95.4% (1%/1mm) | n.s.                                                                                                                                                 | CBCT<br>Tomotherapie<br>CyberKnife<br>Vero                             | Ion-Chamber<br>Film<br>Dedicated Spine<br>Phantom                                        | n.s.                              | Multicenter, comprehensive, Spine SBRT only                                                            |
| Seravalli et al. (2015) [190] | $\Sigma$ 0.49mm<br>$\sigma$ 0.53mm                                       | n.s.                                                                                                                              | n.s.                                                                                                                                                 | CBCT                                                                   | Film                                                                                     | n.s.                              | Monocentric, but comprehensive, SRS only                                                               |
| Wen et al. (2015) [191]       | 0.66 ± 0.18mm<br>(drift over 3 months)                                   | 1.3 ± 0.9%                                                                                                                        | Gamma (no details)<br>99.4 ± 0.8% (3%/3mm)<br>93.0 ± 6.0% (3%/1mm)                                                                                   | Edge                                                                   | Film<br>Ion-Chamber                                                                      | n.s.                              | Monocentric, small test series                                                                         |

|                                    |                                      |      |                                                              |                     |                                                       |       |                                                  |
|------------------------------------|--------------------------------------|------|--------------------------------------------------------------|---------------------|-------------------------------------------------------|-------|--------------------------------------------------|
| Swamy et al. (2015) [213]          | n.s.                                 | n.s. | -2.5% (-4.6–1.2%)<br>-1.6% (-5.1–3.0%)<br>-0.01% (-2.6–2.9%) | CBCT                | CC13 Ion-Chamber<br>A14 Ion-Chamber<br>W1 Ion-Chamber | >10cc | Monocentric, small test series                   |
| Solberg et al. (2014) [194]        | 0.27mm LR<br>0.34mm AP<br>0.27 mm SI | n.s. | n.s.                                                         | Vero                | Film                                                  | n.s.  | Monocentric, commissioning only                  |
| Ma et al. (2014) [192]             | 0.03 ± 0.2 mm (2σ)                   | n.s. | n.s.                                                         | Gamma Knife         | Film                                                  | n.s.  | Monocentric, but large data, SRS only            |
| Novotny et al. (2014) [193]        | <0.2mm                               | n.s. | n.s.                                                         | Gamma Knife         | Film<br>Diodes                                        | n.s.  | Monocentric, but long time data, SRS only        |
| Mamalui-Hunter et al. (2013) [210] | n.s.                                 | n.s. | 2.3% (-5.7–4.9%)                                             | Gamma Knife         | Independent Dose Calculation                          | n.s.  | Monocentric, no measurement, SRS only            |
| Thomas et al. (2013) [214]         | n.s.                                 | n.s. | 3D Gamma (no details)<br>99.9% (5%/3mm)<br>98.0% (3%/2mm)    | Stereo X-Ray        | Gel                                                   | >5cc  | Monocentric, single plan, SRS only               |
| Weyh et al. (2013) [215]           | n.s.                                 | n.s. | Gamma 3% absolute dose and 3mm DTA<br>92.9–100.0%            | CBCT<br>TomoTherapy | Ion-Chamber Array                                     | n.s.  | Monocentric, small cases, no motion compensation |

Supplementary table 1: Guidelines and publications for mechanical and dosimetric accuracy for stereotactic radiotherapy. References in parentheses are part of the respective report in the row above. n.s.: not specified.
